# Supplementary material
Source: Springer Nature journal article supplement (https://edoc.mdc-berlin.de/id/eprint/26539/2/26539suppl.zip)
Supplement: MOESM2 [file 41467_2026_73230_MOESM2_ESM.pdf › 26539suppl/41467_2026_73230_MOESM2_ESM.pdf]

## **Description of Additional Supplementary Files**

### **Differential gene expression and alternative splicing data related to Figure 3:**

- Supplementary Data 1: Differential Gene Expression analysis of RBM20 lacZ and RRM mice.
- Supplementary Data 2: Differential Splicing analysis of RBM20 lacZ and RRM mice.

### **Alternative splicing data related to Figure 5:**

- Supplementary Data 3: Differential Splicing analysis of SHR vs BN rat.
- Supplementary Data 4: Differential Splicing analysis in human HCM.
- Supplementary Data 5: Differential Splicing analysis in human DCM.
- Supplementary Data 6: RBM20 target genes
